# Supplementary material for: Obesity and tobacco smoking are independently associated with poor patient-reported outcomes in SLE: a cross-sectional study
Source: PubMed Central journal article supplement (PMC10980611; doi:10.1007/s00296-024-05546-z), 2024-03-07
Supplement: 296_2024_5546_MOESM1_ESM.pdf [file 296_2024_5546_MOESM1_ESM.pdf]

**Supplementary Table S1. Comorbidities of the study population, stratified by BMI category.**

|                                             | Normal weight<br>(N = 154)  | Underweight<br>(N = 5) | P value  |       | Overweight<br>(N = 111) | P value   |       | Obese<br>(N = 55) | P value  |       |
|---------------------------------------------|-----------------------------|------------------------|----------|-------|-------------------------|-----------|-------|-------------------|----------|-------|
|                                             | Raynaud's phenomenon, n (%) | 51 (33.1)              | 3 (60.0) | 0.233 |                         | 23 (20.7) | 0.028 |                   | 8 (14.5) | 0.011 |
| Secondary Sjögren's syndrome, n (%)         | 31 (20.1)                   | 0                      | 0.983    |       | 26 (23.4)               | 0.520     |       | 15 (27.3)         | 0.274    |       |
| Use of levothyroxine (ever), n (%)          | 18 (11.7)                   | 0                      | 0.989    |       | 21 (18.9)               | 0.104     |       | 9 (16.4)          | 0.377    |       |
| Use of antidepressants (ever), n (%)        | 22 (14.3)                   | 0                      | 0.989    |       | 16 (14.4)               | 0.976     |       | 12 (21.8)         | 0.197    |       |
| Use of antihypertensive drugs (ever), n (%) | 56 (36.4)                   | 3 (60.0)               | 0.298    |       | 60 (54.1)               | 0.004     |       | 38 (69.1)         | <0.001   |       |
| Use of lipid-lowering drugs (ever), n (%)   | 21 (13.6)                   | 0                      | 0.989    |       | 18 (16.2)               | 0.559     |       | 17 (30.9)         | 0.005    |       |

P values derived from univariable logistic regression models with the normal weight group as reference.

**Supplementary Table S2. Comorbidities of the study population, stratified by smoking status.**

|                                             | <b>Never smoker<br/>(N = 172)</b> | <b>Former smoker<br/>(N = 103)</b> |         | <b>Current smoker<br/>(N = 39)</b> |         |
|---------------------------------------------|-----------------------------------|------------------------------------|---------|------------------------------------|---------|
|                                             |                                   |                                    | P value |                                    | P value |
| Raynaud's phenomenon, n (%)                 | 42 (24.4)                         | 26 (25.2)                          | 0.878   | 15 (38.5)                          | 0.078   |
| Secondary Sjögren's syndrome, n (%)         | 35 (20.3)                         | 24 (23.3)                          | 0.564   | 10 (25.6)                          | 0.467   |
| Use of levothyroxine (ever), n (%)          | 27 (15.7)                         | 12 (11.7)                          | 0.353   | 7 (17.9)                           | 0.730   |
| Use of antidepressants (ever), n (%)        | 21 (12.2)                         | 20 (19.4)                          | 0.107   | 8 (20.5)                           | 0.179   |
| Use of antihypertensive drugs (ever), n (%) | 71 (41.3)                         | 61 (59.2)                          | 0.004   | 19 (48.7)                          | 0.397   |
| Use of lipid-lowering drugs (ever), n (%)   | 24 (14.0)                         | 22 (21.4)                          | 0.114   | 7 (17.9)                           | 0.526   |

P values derived from univariable logistic regression models with the never smoker group as reference.

**Supplementary Table S3.** Comparisons of patient-reported outcomes between SLE cases and population-based non-SLE matched controls.

|                                                                             | <b>SLE cases<br/>(N= 325)</b> | <b>Matched controls<br/>(N= 224)</b> | <b>P value</b> |
|-----------------------------------------------------------------------------|-------------------------------|--------------------------------------|----------------|
| Age (years),<br>median (IQR)                                                | 50.1 (36.6–66.6)              | 45.0 (37.0–60.0)                     | 0.053          |
| Women, n (%)                                                                | 278 (85.5)                    | 181 (80.8)                           | 0.175          |
| VAS fatigue (mm),<br>median (IQR)                                           | 38.0 (13.0–67.5)              | 20.0 (10.0–41.5)                     | <0.001         |
| VAS pain (mm),<br>median (IQR)                                              | 22.0 (7.0–48.3)               | 7.00 (0–19.3)                        | <0.001         |
| VAS overall health state/SLE-<br>related health state (mm),<br>median (IQR) | 29.0 (7.0–53.0)               | 10.0 (2.8–23.0)                      | <0.001         |
| HAQ-DI,<br>median (IQR)                                                     | 0.25 (0–0.75)                 | 0 (0–0)                              | <0.001         |
| EQ-5D-3L index score,<br>median (IQR)                                       | 0.73 (0.64–0.80)              | 1.00 (0.80–1.00)                     | <0.001         |
| EQ-5D-3L full health state, n<br>(%)                                        | 62 (19.1)                     | 111 (49.6)                           | <0.001         |

EQ-5D-3L: 3-level EQ-5D; HAQ-DI: Health Assessment Questionnaire Disability Index;  
IQR: interquartile range; SLE: systemic lupus erythematosus; VAS: visual analogue scale.

**Supplementary Table S4.** Linear regression models for the associations between BMI and different patient-reported outcomes, disease activity, and organ damage.

|                                      | <b>Unstandardised coefficient</b> | <b>Standardised coefficient</b> | <b>Standard error</b> | <b>P value</b> |
|--------------------------------------|-----------------------------------|---------------------------------|-----------------------|----------------|
| <b>Unadjusted models</b>             |                                   |                                 |                       |                |
| VAS fatigue                          | 0.947                             | 0.151                           | 0.352                 | 0.007          |
| VAS pain                             | 0.996                             | 0.180                           | 0.307                 | 0.001          |
| VAS overall SLE-related health state | 0.714                             | 0.125                           | 0.320                 | 0.026          |
| EQ-5D-3L                             | -0.008                            | -0.130                          | 0.004                 | 0.019          |
| HAQ-DI                               | 0.021                             | 0.163                           | 0.007                 | 0.003          |
| cSLEDAI-2K                           | -0.138                            | -0.178                          | 0.043                 | 0.001          |
| SDI                                  | 0.025                             | 0.062                           | 0.023                 | 0.278          |
| <b>Adjusted models</b>               |                                   |                                 |                       |                |
| VAS fatigue                          | 1.101                             | 0.176                           | 0.372                 | 0.003          |
| VAS pain                             | 1.171                             | 0.214                           | 0.319                 | <0.001         |
| VAS overall SLE-related health state | 0.945                             | 0.166                           | 0.322                 | 0.004          |
| EQ-5D-3L                             | -0.011                            | -0.165                          | 0.113                 | <0.001         |
| HAQ-DI                               | 0.022                             | 0.169                           | 0.007                 | 0.002          |
| cSLEDAI-2K                           | -0.106                            | -0.136                          | 0.044                 | 0.017          |
| SDI                                  | -0.029                            | -0.071                          | 0.020                 | 0.154          |

Adjusted models: adjusted for age, sex, disease duration, SDI, cSLEDAI-2K.

BMI: body mass index; cSLEDAI-2K: clinical SLE Disease Activity Index 2000; EQ-5D-3L: 3-level EQ-5D; HAQ-DI: Health Assessment Questionnaire Disability Index; SDI: SLICC/ACR Damage Index; SLE: systemic lupus erythematosus; VAS: visual analogue scale.

**Supplementary Table S5.** Linear regression models for the associations between smoking status and different patient-reported outcomes, disease activity, and organ damage.

|                                      | Smoking status* | Unstandardised coefficient | Standardised coefficient | Standard error | P value |
|--------------------------------------|-----------------|----------------------------|--------------------------|----------------|---------|
| <b>Unadjusted models</b>             |                 |                            |                          |                |         |
| VAS fatigue                          | F               | 7.73                       | 0.12                     | 3.70           | 0.037   |
|                                      | C               | 17.11                      | 0.19                     | 5.19           | 0.001   |
| VAS pain                             | F               | 4.55                       | 0.08                     | 3.23           | 0.161   |
|                                      | C               | 16.10                      | 0.20                     | 4.56           | <0.001  |
| VAS overall SLE-related health state | F               | 5.24                       | 0.09                     | 3.39           | 0.124   |
|                                      | C               | 9.94                       | 0.12                     | 4.78           | 0.038   |
| EQ-5D-3L                             | F               | -0.096                     | -0.151                   | 0.037          | 0.019   |
|                                      | C               | -0.112                     | -0.125                   | 0.052          | 0.009   |
| HAQ-DI                               | F               | 0.13                       | 0.10                     | 0.08           | 0.081   |
|                                      | C               | 0.28                       | 0.15                     | 0.11           | 0.010   |
| cSLEDAI-2K                           | F               | -0.04                      | 0.00                     | 0.46           | 0.938   |
|                                      | C               | 0.10                       | 0.01                     | 0.66           | 0.879   |
| SDI                                  | F               | 0.60                       | 0.16                     | 0.23           | 0.009   |
|                                      | C               | 0.01                       | 0.00                     | 0.32           | 0.982   |
| <b>Adjusted models</b>               |                 |                            |                          |                |         |
| VAS fatigue                          | F               | 9.39                       | 0.15                     | 3.81           | 0.014   |
|                                      | C               | 17.21                      | 0.20                     | 5.19           | 0.001   |
| VAS pain                             | F               | 5.42                       | 0.10                     | 3.32           | 0.103   |
|                                      | C               | 15.84                      | 0.20                     | 4.53           | <0.001  |
| VAS overall SLE-related health state | F               | 5.79                       | 0.10                     | 3.36           | 0.086   |
|                                      | C               | 9.50                       | 0.12                     | 4.60           | 0.040   |
| EQ-5D-3L                             | F               | -0.078                     | -0.12                    | 0.037          | 0.038   |
|                                      | C               | -0.110                     | -0.12                    | 0.051          | 0.031   |
| HAQ-DI                               | F               | 0.06                       | 0.05                     | 0.07           | 0.416   |
|                                      | C               | 0.27                       | 0.15                     | 0.10           | 0.006   |
| cSLEDAI-2K                           | F               | 0.15                       | 0.02                     | 0.47           | 0.751   |
|                                      | C               | 0.34                       | 0.03                     | 0.65           | 0.596   |
| SDI                                  | F               | 0.33                       | 0.08                     | 0.20           | 0.097   |
|                                      | C               | -0.05                      | -0.01                    | 0.27           | 0.849   |

Adjusted models: age, sex, disease duration, SDI, cSLEDAI-2K.

cSLEDAI-2K: clinical SLE Disease Activity Index 2000; EQ-5D-3L: 3-level EQ-5D; HAQ-DI: Health Assessment Questionnaire Disability Index; SDI: SLICC/ACR Damage Index; SLE: systemic lupus erythematosus; VAS: visual analogue scale.

\* C: current smoker; F: former smoker. Reference: never smoker.

**Supplementary Table S6.** Interaction between obesity and smoking status for unacceptable levels of fatigue.

|                                                                                  | <b>Non-smoker</b>           | <b>Ever smoker</b>          | <b>Effect of smoking ever within the strata of obese</b> |
|----------------------------------------------------------------------------------|-----------------------------|-----------------------------|----------------------------------------------------------|
| <b>Non-obese</b>                                                                 | 1.0 (reference)             | 2.1 (1.2 to 3.7)<br>p=0.010 | 2.1 (1.2 to 3.7)<br>p=0.010                              |
| <b>Obese</b>                                                                     | 2.8 (1.1 to 6.8)<br>p=0.028 | 2.4 (1.0 to 5.5)<br>p=0.047 | 0.9 (0.3 to 2.6)<br>p=0.794                              |
| <b>Effect of obese within the strata of smoking ever</b>                         | 2.8 (1.1 to 6.8)<br>p=0.028 | 1.1 (0.5 to 2.6)<br>p=0.801 |                                                          |
| Effect modification on multiplicative scale (95% CI): 0.4 (0.1 to 1.4) p=0.156   |                             |                             |                                                          |
| Effect modification on additive scale (RERI; 95% CI): -1.5 (-4.7 to 1.6) p=0.826 |                             |                             |                                                          |

Data are presented as individual and joint odds ratios (95% confidence interval), with non-smoker and non-obese as the reference. Measures of additive and multiplicative effect modification are provided.

RERI: Relative Excess Risk due to Interaction.

**Supplementary Table S7.** Interaction between obesity and smoking status for unacceptable levels of pain.

|                                                                                   | <b>Non-smoker</b>            | <b>Ever smoker</b>          | <b>Effect of smoking ever within the strata of obese</b> |
|-----------------------------------------------------------------------------------|------------------------------|-----------------------------|----------------------------------------------------------|
| <b>Non-obese</b>                                                                  | 1.0 (reference)              | 2.4 (1.4 to 4.1)<br>p=0.002 | 2.4 (1.4 to 4.1)<br>p=0.002                              |
| <b>Obese</b>                                                                      | 7.2 (2.8 to 18.3)<br>p<0.001 | 2.9 (1.3 to 6.7)<br>p=0.011 | 0.4 (0.1 to 1.3)<br>p=0.115                              |
| <b>Effect of obese within the strata of smoking ever</b>                          | 7.2 (2.8 to 18.3)<br>p<0.001 | 1.2 (0.5 to 2.8)<br>p=0.626 |                                                          |
| Effect modification on multiplicative scale (95% CI): 0.2 (0.1 to 0.6) p=0.006    |                              |                             |                                                          |
| Effect modification on additive scale (RERI; 95% CI): -5.6 (-17.1 to 0.4) p=0.942 |                              |                             |                                                          |

Data are presented as individual and joint odds ratios (95% confidence interval), with non-smoker and non-obese as the reference. Measures of additive and multiplicative effect modification are provided.

RERI: Relative Excess Risk due to Interaction.



**Supplementary Table S8.** Interaction between obesity and smoking status for unacceptable overall SLE-related health state.

|                                                                                  | <b>Non-smoker</b>           | <b>Ever smoker</b>          | <b>Effect of smoking ever within the strata of obese</b> |
|----------------------------------------------------------------------------------|-----------------------------|-----------------------------|----------------------------------------------------------|
| <b>Non-obese</b>                                                                 | 1.0 (reference)             | 1.6 (0.9 to 2.9)<br>p=0.100 | 1.6 (0.9 to 2.9)<br>p=0.100                              |
| <b>Obese</b>                                                                     | 3.2 (1.3 to 7.8)<br>p=0.012 | 2.0 (0.8 to 4.7)<br>p=0.123 | 0.6 (0.2 to 1.9)<br>p=0.409                              |
| <b>Effect of obese within the strata of smoking ever</b>                         | 3.2 (1.3 to 7.8)<br>p=0.012 | 1.2 (0.5 to 2.9)<br>p=0.671 |                                                          |
| Effect modification on multiplicative scale (95% CI): 0.4 (0.1 to 1.3) p=0.133   |                             |                             |                                                          |
| Effect modification on additive scale (RERI; 95% CI): -1.8 (-5.0 to 1.4) p=0.864 |                             |                             |                                                          |

Data are presented as individual and joint odds ratios (95% confidence interval), with non-smoker and non-obese as the reference. Measures of additive and multiplicative effect modification are provided.

RERI: Relative Excess Risk due to Interaction.
